# Supplementary material for: The Clinical and Etiological Characteristics of Influenza-Like Illness (ILI) in Outpatients in Shanghai, China, 2011 to 2013
Source: PubMed Central journal article supplement (PMC4379014; doi:10.1371/journal.pone.0119513), 2015-03-30
Supplement: pone.0119513.s002.pdf [file pone.0119513.s002.pdf]

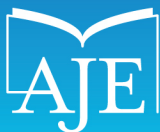

# EDITORIAL CERTIFICATE

This document certifies that the manuscript listed below was edited for proper English language, grammar, punctuation, spelling, and overall style by one or more of the highly qualified native English speaking editors at American Journal Experts.

## Manuscript title:

Clinical and etiological characteristics of influenza-like illness (ILI) in outpatients in Shanghai, China, 2011 to 2013

## Authors:

Yifei Fu, Lifeng Pan, Qiao Sun, Linying Zhu, Qing Liu, Ping Ma, Huifang Qiu, Weiping Zhu, Chuchu Ye, Caoyi Xue, Yuanping Wang

## Date Issued:

January 23, 2015

## Certificate Verification Key:

BCB9-4447-E689-12FE-28EC

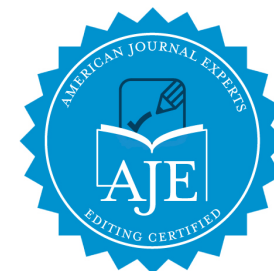

This certificate may be verified at [www.aje.com/certificate](http://www.aje.com/certificate). This document certifies that the manuscript listed above was edited for proper English language, grammar, punctuation, spelling, and overall style by one or more of the highly qualified native English speaking editors at American Journal Experts. Neither the research content nor the authors' intentions were altered in any way during the editing process. Documents receiving this certification should be English-ready for publication; however, the author has the ability to accept or reject our suggestions and changes. To verify the final AJE edited version, please visit our verification page. If you have any questions or concerns about this edited document, please contact American Journal Experts at [support@aje.com](mailto:support@aje.com).
